# Supplementary material for: Performance of five molecular methods for monitoring Arcobacter spp
Source: PubMed Central journal article supplement (PMC3850767; doi:10.1186/1471-2180-13-220), 2013-10-03
Supplement: 1471-2180-13-220-S1.pdf [file 1471-2180-13-220-S1.pdf]

**Table S1** Strains of *Arcobacter* spp. used in the study.

| <b>SPECIES</b>                         | <b>STRAIN</b>                                                                                                                                                                                                                                                                                                                                                                                                                                              | <b>SOURCE</b>                                                                                                                                           |
|----------------------------------------|------------------------------------------------------------------------------------------------------------------------------------------------------------------------------------------------------------------------------------------------------------------------------------------------------------------------------------------------------------------------------------------------------------------------------------------------------------|---------------------------------------------------------------------------------------------------------------------------------------------------------|
| <b><i>A. bivalviorum</i></b><br>n=3    | F4 <sup>T,a,b</sup> , F118-2 <sup>a,b</sup> , F118-4 <sup>a,b</sup>                                                                                                                                                                                                                                                                                                                                                                                        | Mussels                                                                                                                                                 |
| <b><i>A. butzleri</i></b><br>n=21      | LMG 10828 <sup>T,a,b</sup> , LMG 11118 <sup>b</sup><br>F42, F46 <sup>a,b</sup> , F49, F51<br>F15, F22, F23, F24, F25<br>F47, F52<br>F50 <sup>b</sup> , F53<br>F1, F2, F29, F30, F98-1<br>T62                                                                                                                                                                                                                                                               | Human faeces<br>Pork<br>Turkey<br>Chicken<br>Beef<br>Mussels<br>Soil                                                                                    |
| <b><i>A. cibarius</i></b><br>n=8       | CECT 7203 <sup>T,a,b</sup><br>NC81 <sup>b</sup> , NC88 <sup>b</sup><br>H742, H743 <sup>b</sup> , H745, H746 <sup>b</sup> , H748                                                                                                                                                                                                                                                                                                                            | Chicken<br>Piggery effluent<br>Poultry carcasses                                                                                                        |
| <b><i>A. cloacae</i></b><br>n=2        | SW28-13 <sup>T,a,b</sup><br>F26 <sup>a,b</sup>                                                                                                                                                                                                                                                                                                                                                                                                             | Sewage<br>Mussels                                                                                                                                       |
| <b><i>A. cryaerophilus</i></b><br>n=19 | LMG 9904 <sup>T,a,b</sup> , LMG 9871 <sup>a</sup><br>LMG 9865 <sup>a,b</sup> , LMG 10241 <sup>b</sup> , LMG 6622, LMG 10229 <sup>a,b</sup><br><br>LMG 9065 <sup>a</sup> , LMG 7537 <sup>a</sup> , LMG 9863 <sup>a,b</sup><br>LMG 10829 <sup>a</sup><br><br>LMG 9861 <sup>a,b</sup><br>FE4 <sup>a,b</sup> , FE5 <sup>a,b</sup> , FE6 <sup>a,b</sup> , FE9 <sup>a,b</sup> , FE11 <sup>a</sup> , FE13 <sup>a</sup> , FE17 <sup>a</sup><br>FE14 <sup>b</sup> , | Bovine abortion<br>foetus<br>Porcine abortion<br>Ovine abortion<br>foetus<br>Human blood<br>Bovine abortion<br>foetus<br>Chicken faeces<br>Ovine faeces |
| <b><i>A. defluvii</i></b><br>n=11      | CECT 7697 <sup>T,a,b</sup> , SW28-7 <sup>a,b</sup> , SW28-8, SW28-9, SW28-10, SW30-2 <sup>a,b</sup> ,<br>SW30-7, SW30-8<br>CC42 <sup>b</sup><br>CH8-2, SAN599-9 <sup>b</sup>                                                                                                                                                                                                                                                                               | Sewage<br>Pig faeces<br>Mussels                                                                                                                         |
| <b><i>A. ellisii</i></b><br>n=3        | F79-6 <sup>T,a,b</sup> , F79-2 <sup>a,b</sup> , F79-7 <sup>a,b</sup>                                                                                                                                                                                                                                                                                                                                                                                       | Mussels                                                                                                                                                 |
| <b><i>A. halophilus</i></b><br>n=1     | LA31B <sup>T,a,b</sup>                                                                                                                                                                                                                                                                                                                                                                                                                                     | Hypersaline lagoon                                                                                                                                      |
| <b><i>A. marinus</i></b><br>n=1        | CECT 7727 <sup>T,a,b</sup>                                                                                                                                                                                                                                                                                                                                                                                                                                 | Seawater/starfish                                                                                                                                       |

|                                      |                                                                                                                        |                                                         |
|--------------------------------------|------------------------------------------------------------------------------------------------------------------------|---------------------------------------------------------|
| <b><i>A. molluscorum</i></b><br>n=3  | CECT 7696 <sup>T,a,b</sup> , F91 <sup>a,b</sup> , F101-1 <sup>a,b</sup>                                                | Mussels                                                 |
| <b><i>A. mytili</i></b><br>n=3       | CECT 7386 <sup>T,a,b</sup> , CECT 7385 <sup>a,b</sup><br>T234 <sup>b</sup>                                             | Mussels<br>Brackish water                               |
| <b><i>A. nitrofigilis</i></b><br>n=5 | CECT 7204 <sup>T,a,b</sup> , LMG 7547 <sup>b</sup><br>F39 <sup>b</sup> , F40 <sup>†</sup> , F72 <sup>b</sup>           | Roots of <i>Spartina alterniflora</i><br>Mussels        |
| <b><i>A. skirrowii</i></b><br>n=5    | LMG 6621 <sup>T,a,b</sup><br>LMG 9911<br>Houf 989 <sup>a,b</sup> , Houf 994 <sup>b</sup><br>S7 <sup>b</sup>            | Lamb faeces<br>Porcine abortion<br>Cow faeces<br>Sludge |
| <b><i>A. suis</i></b><br>n=1         | F41 <sup>T,a,b</sup>                                                                                                   | Pork                                                    |
| <b><i>A. thereius</i></b><br>n=5     | LMG 24486 <sup>T,a,b</sup> , LMG 24487 <sup>a,b</sup><br>SW24 <sup>b</sup><br>F61-1 <sup>b</sup><br>F93-4 <sup>b</sup> | Porcine abortion<br>foetus<br>Sewage<br>Pork<br>Clams   |
| <b><i>A. trophiarum</i></b><br>n=3   | LMG 25534 <sup>T,a,b</sup> , LMG 25535 <sup>a,b</sup><br>CECT 7650 <sup>a,b</sup>                                      | Pig faeces<br>Chicken cloaca                            |
| <b><i>A. venerupis</i></b><br>n=1    | F67-11 <sup>T,a,b</sup>                                                                                                | Clams                                                   |

ATCC: American Type Culture Collection. LMG: Belgian Co-ordinated Collection of Microorganisms. CECT: Colección Española de Cultivos Tipo.

<sup>a</sup>Strains from which the 16S rRNA gene was sequenced for verification of identity [19].

<sup>b</sup>Strains from which the *rpoB* gene was sequenced for verification of identity [19].

**Table S2** Targeted genes and PCR conditions of the compared methods.

| Author                        | Targeted species (expected amplicon)                                                                                                              | Targeted gene: Position (nt) <sup>a</sup>                                                                                | Primers (pmol)                                                                               | Concentrations <sup>b,c</sup>                                             | Conditions                                                                                                                                                    |
|-------------------------------|---------------------------------------------------------------------------------------------------------------------------------------------------|--------------------------------------------------------------------------------------------------------------------------|----------------------------------------------------------------------------------------------|---------------------------------------------------------------------------|---------------------------------------------------------------------------------------------------------------------------------------------------------------|
| Houf <i>et al.</i> [14]       | <i>A. butzleri</i> (400)<br><i>A. cryaerophilus</i> (230)<br><i>A. skirrowii</i> (640)                                                            | 16S rRNA: 959 – 1357<br>23S rRNA: 1720 – 1964<br>16S rRNA: 705 - 1357                                                    | ARCO (50)<br>BUTZ (50)<br>CRY1 (50)<br>CRY2 (50)<br>SKIR (25)                                | MgCl <sub>2</sub> 1.3 mmol l <sup>-1</sup><br>Taq DNA<br>polymerase 1.5 U | Initial denaturation 94°C, 2 min and final extension 72°C, 5 min<br>32 Cycles of: Denaturation 94°C, 45 s; Annealing 61°C, 45 s; Chain extension 72°C, 30 s   |
| Kabeya <i>et al.</i> [15]     | <i>A. butzleri</i> (692)<br><i>A. cryaerophilus</i> 1A (728)<br><i>A. cryaerophilus</i> 1B (152)<br><i>A. skirrowii</i> (448)                     | 23S rRNA: 1174 - 1865<br>23S rRNA: 1135 – 1865<br>23S rRNA: 1713 – 1865<br>23S rRNA: 1423 - 1865                         | N.c.1A (25)<br>ARCO-U (25)<br>N.butz (2.5)<br>N.c.1B (2.5)<br>N.ski (2.5)                    | MgCl <sub>2</sub> 1.5 mmol l <sup>-1</sup><br>Taq DNA<br>polymerase 2.5 U | Initial denaturation 94°C, 3 min and final extension 72°C, 5 min<br>30 Cycles of: Denaturation 94°C, 30 s; Annealing 62°C, 60 s; Chain extension 72°C, 60 s   |
| Figueras <i>et al.</i> [18]   | Species specific patterns for species <sup>d</sup>                                                                                                | 16S rRNA: 47 - 1073                                                                                                      | CAH 1am (25)<br>CAH 1b (25)                                                                  | MgCl <sub>2</sub> 1.5 mmol l <sup>-1</sup><br>Taq DNA<br>polymerase 2.5 U | Initial denaturation 94°C, 2 min, final extension 72°C, 10 min<br>30 Cycles of: Denaturation 94°C, 30 s; Annealing 52°C, 30 s; Chain extension 72°C, 90 s     |
| Pentimalli <i>et al.</i> [16] | <i>A. butzleri</i> (203)<br><i>A. cryaerophilus</i> (212)<br><i>A. skirrowii</i> (257)<br><i>A. cibarius</i> (145)                                | 16S rRNA: 803 – 1006<br><i>gyrA</i> : 2337 – 2549<br><i>gyrA</i> : 1366 – 1622<br><i>gyrA</i> : 2364 - 2778              | 16S Arcobutz (30)<br>Gyr Arcocry (30)<br>Gyr Arcoski (30)<br>Gyr Arcocib (50)<br>All F and R | MgCl <sub>2</sub> 2.0 mmol l <sup>-1</sup><br>Taq DNA<br>polymerase 2.0 U | Initial denaturation 94°C, 2 min and final extension 72°C, 7 min<br>40 Cycles of: Denaturation 94°C, 60 s; Annealing 55°C, 60 s; Chain extension 72°C, 60 s   |
| Doudah <i>et al.</i> [9]      | <i>A. butzleri</i> (2061)<br><i>A. cryaerophilus</i> (395)<br><i>A. skirrowii</i> (198)<br><i>A. cibarius</i> (1125)<br><i>A. thereius</i> (1590) | 23S rRNA: 646 - 2707<br><i>gyrA</i> : 2255 – 2640<br>23S rRNA: 646 – 844<br>23S rRNA: 646 - 1771<br>23S rRNA: 646 - 2236 | ButR (50)<br>SkiR (50)<br>TheR (50)<br>CibR (50)<br>ArcoF (50)<br>GyrasF (50)<br>GyrasR (50) | MgCl <sub>2</sub> 1.5 mmol l <sup>-1</sup><br>Taq DNA<br>polymerase 1.5 U | Initial denaturation 94°C, 2 min and final extension 72°C, 10 min<br>30 Cycles of: Denaturation 94°C, 45 s; Annealing 58°C, 45 s; Chain extension 72°C, 2 min |
| De Smet <i>et al.</i> [17]    | <i>A. trophiarum</i> (382)                                                                                                                        | <i>hsp60</i> : 686 - 1068                                                                                                | <i>hsp60</i> F and R (50)                                                                    | MgCl <sub>2</sub> 1.4 mmol l <sup>-1</sup><br>Taq DNA<br>polymerase 2.0 U | 94°C, 3 min, final extension 72°C, 5 min<br>30 Cycles of: Denaturation 94°C, 45 s; Annealing 58°C, 45 s; Chain extension 72°C, 30 s                           |
| Figueras <i>et al.</i> [19]   | Species specific patterns for the different species <sup>d</sup>                                                                                  | 16S rRNA: 47 - 1073                                                                                                      | CAH 1am (25)<br>CAH 1b (25)                                                                  | MgCl <sub>2</sub> 1.5 mmol l <sup>-1</sup><br>Taq DNA<br>polymerase 2.5 U | Initial denaturation 94°C, 2 min, final extension 72°C, 10 min<br>30 Cycles of: Denaturation 94°C, 30 s; Annealing 52°C, 30 s; Chain extension 72°C, 90 s     |

<sup>a</sup> Positions of 16S rRNA gene are based on *Escherichia coli*, and those of the 23S rRNA and *gyrA* genes on sequences present in the genome of *A. butzleri* RM4018.

<sup>b</sup> All PCRs included dATP, dCTP, dGTP, and dTTP (Applied Biosystems<sup>(TM)</sup>) at a concentration of 200 μM each, 5 μl 10X Invitrogen<sup>(TM)</sup> buffer, and Milli-Q water in a final volume of 50 μl. The Taq DNA polymerase was supplied by Invitrogen<sup>(TM)</sup>.

<sup>c</sup> For the m-PCR of Kabeya *et al.* (15) 50 μg of DNA was used, and 100 μg for the other methods.

<sup>d</sup> Digestion of the 16S rRNA obtained amplicon (1026 bp) with the different endonucleases *MseI* [18], *MseI*, *MnlI*, or *Bfal* [19] generated species specific RFLP patterns for the 17 tested species of the genus.

**Table S3** Literature review of 171 studies (2000-2012)<sup>a</sup> that identified 4223 strains of *Arcobacter* using the five compared PCR methods.

**Number of Identified strains (%) of the different species in relation with the method used**

| Species                             | No (%)       | Houf <i>et al.</i> [14] | Kabeya <i>et al.</i> [15] | Figueras <i>et al.</i> [18] | Doudiah <i>et al.</i> [9]               |
|-------------------------------------|--------------|-------------------------|---------------------------|-----------------------------|-----------------------------------------|
|                                     |              |                         |                           |                             | De Smet <i>et al.</i> [17] <sup>b</sup> |
| <i>A. butzleri</i>                  | 2690 (63.7%) | 1763 (64.5%)            | 241 (79%)                 | 445 (72.2%)                 | 241 (42.5%)                             |
| <i>A. cryaerophilus</i>             | 1152 (27.3%) | 850 (31.1%)             | 45 (14.8%)                | 112 (18.2%)                 | 145 (25.6%)                             |
| <i>A. skirrowii</i>                 | 209 (4.9%)   | 87 (3.2%)               | 19 (6.2%)                 | 33 (5.4%)                   | 70 (12.3%)                              |
| <b>Other <i>Arcobacter</i> spp.</b> | 172 (4.1%)   | 35 (1.3%) <sup>c</sup>  | ---                       | 26 (4.2%) <sup>c</sup>      | 111 (19.6%) <sup>d</sup>                |
| <b>Total</b>                        | 4223         | 2735 (64.8%)            | 305 (7.2%)                | 616 (14.6%)                 | 567 (13.4%)                             |

<sup>a</sup>Of the 171 references found using the ISI Web of Knowledge (last access on July 30<sup>th</sup> 2012), Houf *et al.* [14] was cited in 123 studies; Kabeya *et al.* [15] in 21; Doudiah *et al.* [9]/De Smet *et al.* [17] in 11; and Figueras *et al.* [18] in 16. Pentimalli *et al.* [16] was cited three times, but used only for background information.

<sup>b</sup>The method designed by De Smet *et al.* [17] only detects or identifies *A. trophiarum*, and was intended to complement the m-PCR of Doudiah *et al.* [9]. Therefore, they are grouped together as a single method.

<sup>c</sup>The remaining 14 *Arcobacter* spp. were detected using other molecular identification methods such as 16S rRNA or *rpoB* gene sequencing and/or 16S rRNA-RFLP [17,18] used in parallel [5,6,7,23,24,25,26].

<sup>d</sup>These strains included 100 *A. thereius*, 10 *A. trophiarum*, and 1 *A. cibarius* (0.2%, 1/567) that were identified by De Smet *et al.* [27,28] using this combination of methods.
